# Supplementary material for: Comprehensive Metabolomic Analysis of IDH1R132H Clinical Glioma Samples Reveals Suppression of β-oxidation Due to Carnitine Deficiency
Source: PubMed Central journal article supplement (PMC6611790; doi:10.1038/s41598-019-46217-5), 2019-07-05
Supplement: 41598_2019_46217_MOESM1_ESM.pdf [file 41598_2019_46217_MOESM1_ESM.pdf]

# Comprehensive Metabolomic Analysis of *IDH1*<sup>R132H</sup> Clinical Glioma Samples Reveals

## Suppression of $\beta$ -oxidation Due to Carnitine Deficiency

Satsuki Miyata<sup>1\*</sup>, Kaoru Tominaga<sup>2\*</sup>, Eiji Sakashita<sup>2</sup>, Masashi Urabe<sup>3</sup>, Yoshiyuki Onuki<sup>1</sup>,

Akira Gomi<sup>4</sup>, Takashi Yamaguchi<sup>1</sup>, Makiko Mieno<sup>5</sup>, Hiroaki Mizukami<sup>3</sup>, Akihiro Kume<sup>3</sup>,

Keiya Ozawa<sup>3</sup>, Eiju Watanabe<sup>1</sup>, Kensuke Kawai<sup>1</sup> and Hitoshi Endo<sup>2\*</sup>

1. Department of Neurosurgery, Jichi Medical University, Tochigi, Japan
2. Department of Biochemistry, Jichi Medical University, Tochigi, Japan
3. Division of Genetic Therapeutics, Center for Molecular Medicine, Jichi Medical University, Tochigi, Japan
4. Department of Pediatric Neurosurgery, Jichi Children's Medical Center, Jichi Medical University, Tochigi, Japan
5. Department of Medical Informatics, Center for Information, Jichi Medical University, Tochigi, Japan

Address for correspondence: Satsuki Miyata (smiyata@jichi.ac.jp), Kaoru Tominaga

(tominaga@jichi.ac.jp) and Hitoshi Endo (hendo@jichi.ac.jp)

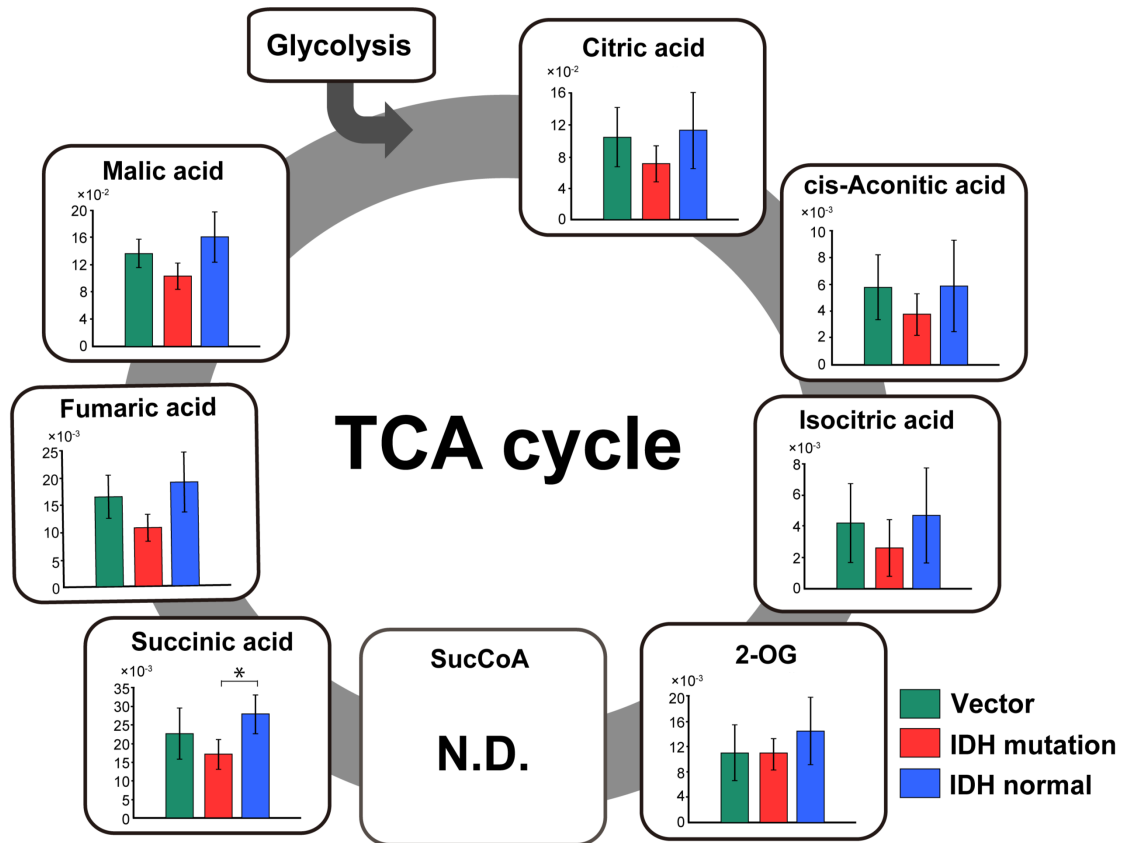

**Supplementary Figure S1.** TCA cycle analysis in the cell experiment.

The TCA cycle was reduced in the *IDH* mutant glioma cell line (red bars). Each vertical scale shows the relative quantification based on the internal standard. Green bars, empty vector-transfected cells; red bars, *IDH1<sup>R132H</sup>*-transfected cells; blue bars, normal *IDH1*-transfected cells; N.D., not detected; error bar, standard error of mean. \*P < 0.05.

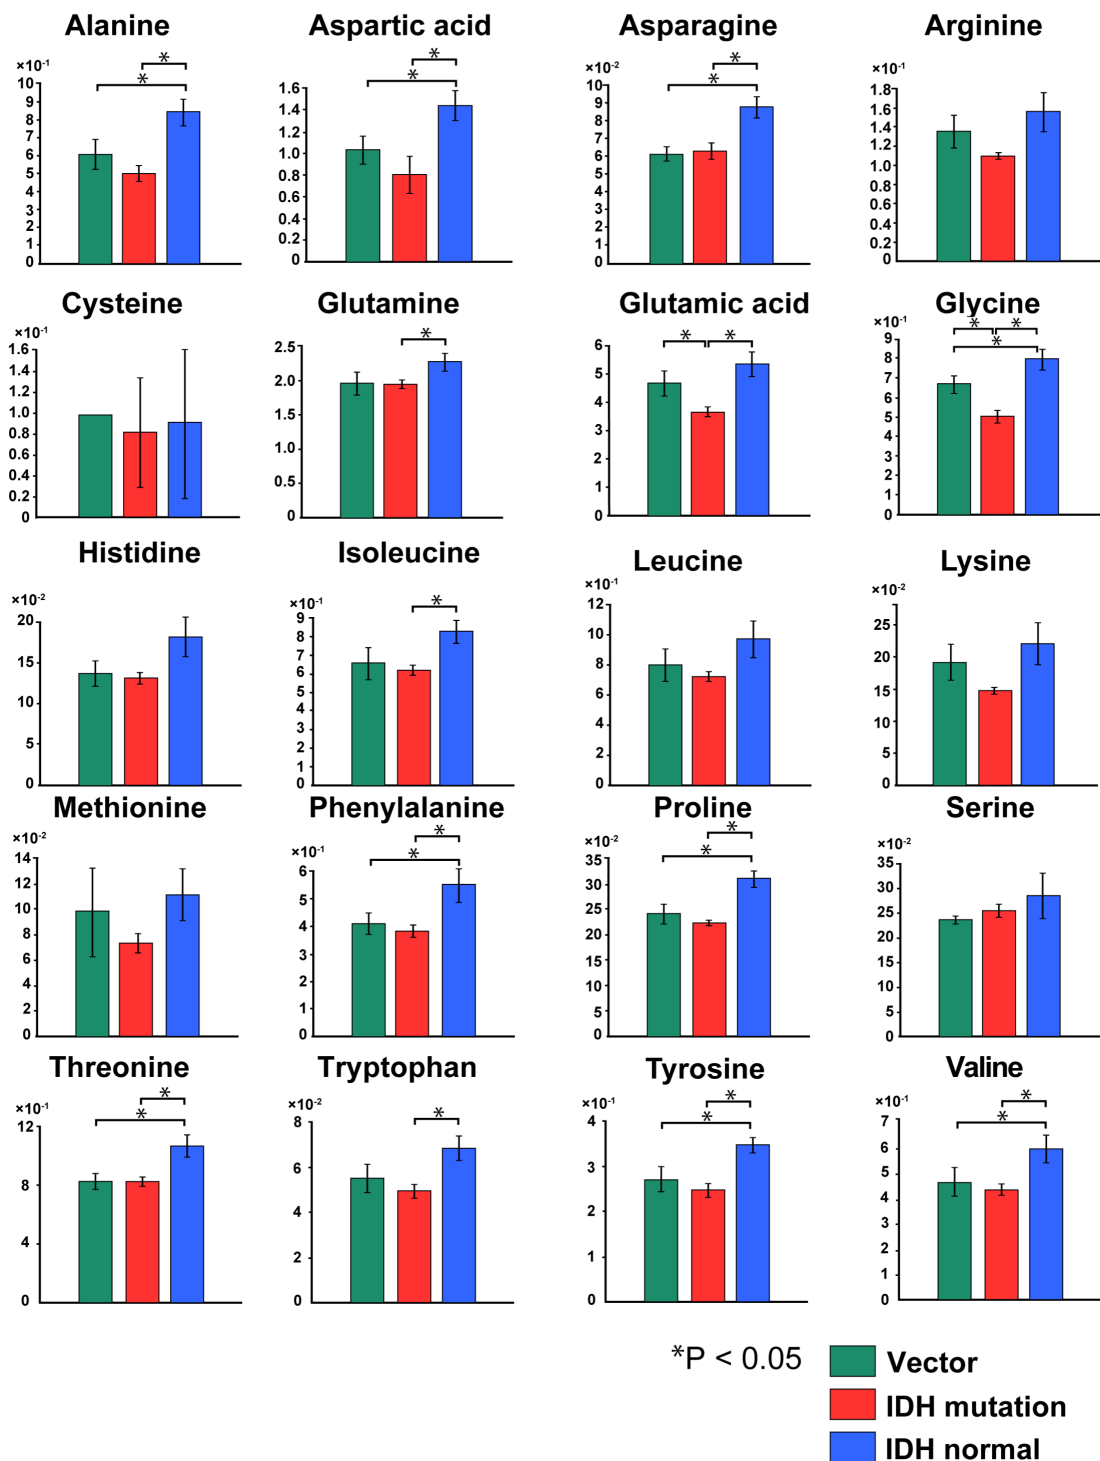

**Supplementary Figure S2.** Amino acid analysis in the cell experiment.

Amino acid production was reduced in the *IDH* mutant glioma cell line (red bars). Each vertical scale shows the relative quantification based on the internal standard. Green bars, empty vector-transfected cells; red bars, *IDH1*<sup>R132H</sup>-transfected cells; blue bars, normal *IDH1*-transfected cells; error bar, standard error of mean. \*P < 0.05.

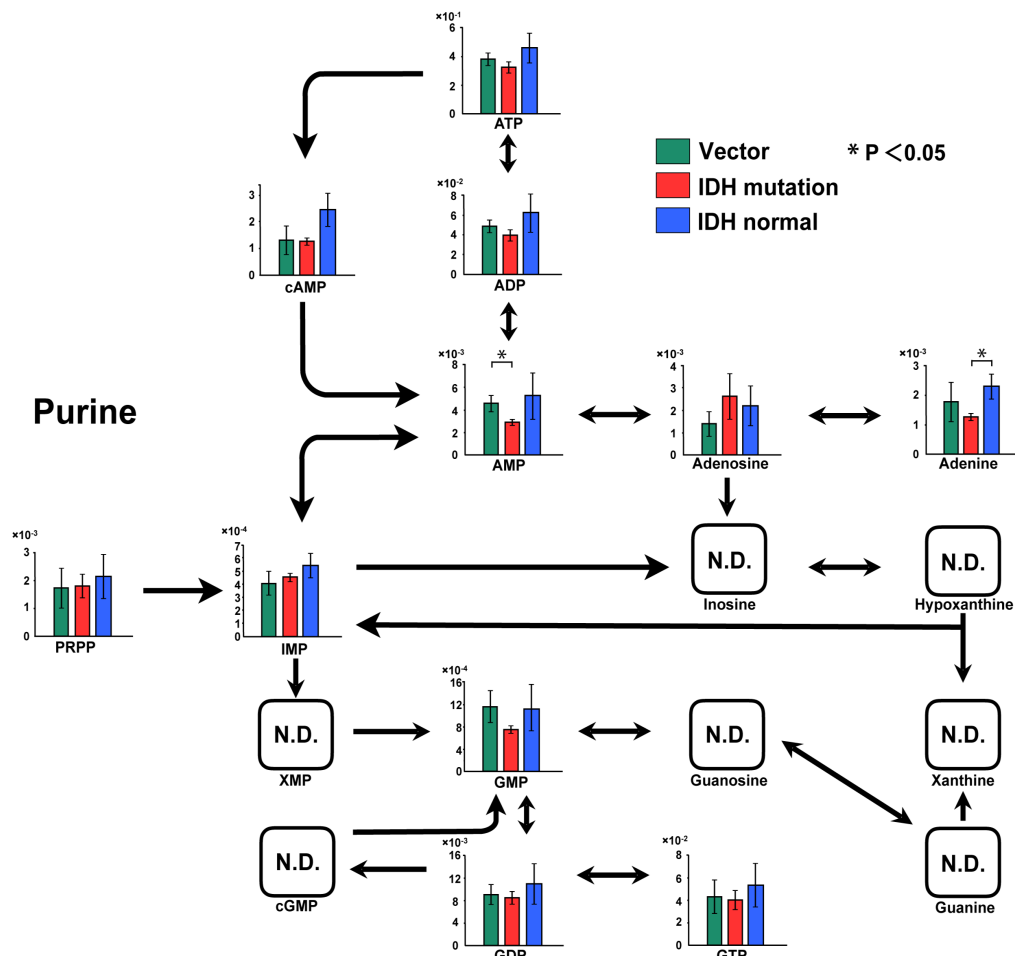

**Supplementary Figure S3.** Purine metabolic pathway in the cell experiment.

Purine metabolic production was reduced in the cells expressing *IDH* mutant protein (red bars). Each vertical scale shows the relative quantification based on the internal standard. Green bars, empty vector-transfected cells; red bars, *IDH1*<sup>R132H</sup>-transfected cells; blue bars, normal *IDH1*-transfected cells; N.D., not detected; error bar, standard error of mean. \*P < 0.05.

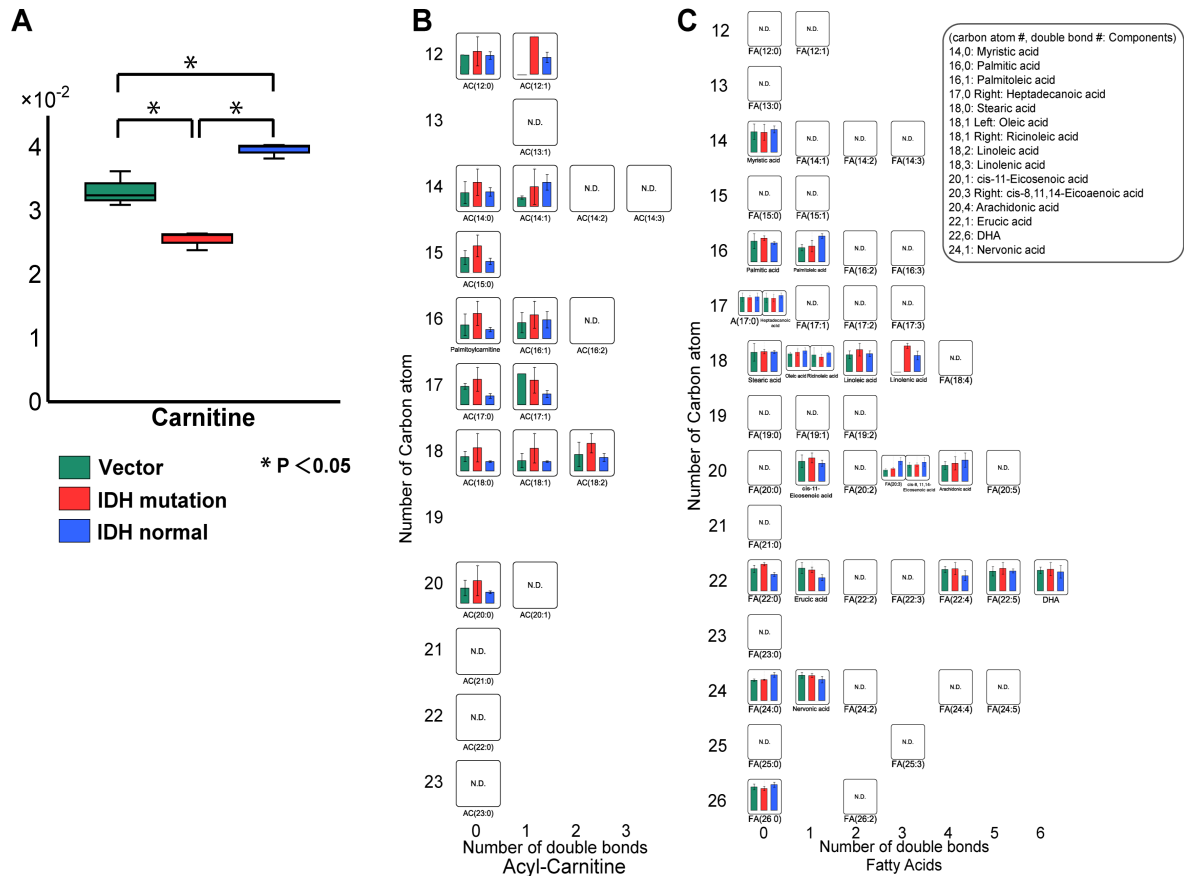

**Supplementary Figure S4.** Analysis of lipid metabolism in the cell experiment.

(A) Carnitine was reduced in the mutant *IDH* expressing cells (red bars). (B) Acyl-carnitine, which was required the same or slightly elevated in the cells expressing *IDH* mutant protein (red bars). (C) Fatty acid production tended to be enhanced in the cells expressing *IDH* mutant protein (red bars). The numeric labels on the left side, horizontal axis, and vertical axis represent the number of carbon atoms, the number of double bonds, and the relative quantification based on the internal standard, respectively. Green bars, empty vector-transfected cells; red bars, *IDH1*<sup>R132H</sup>-transfected cells; blue bars, *IDH1* normal-transfected cells, N.D., not detected; error bar, standard error of mean. \*P < 0.05.

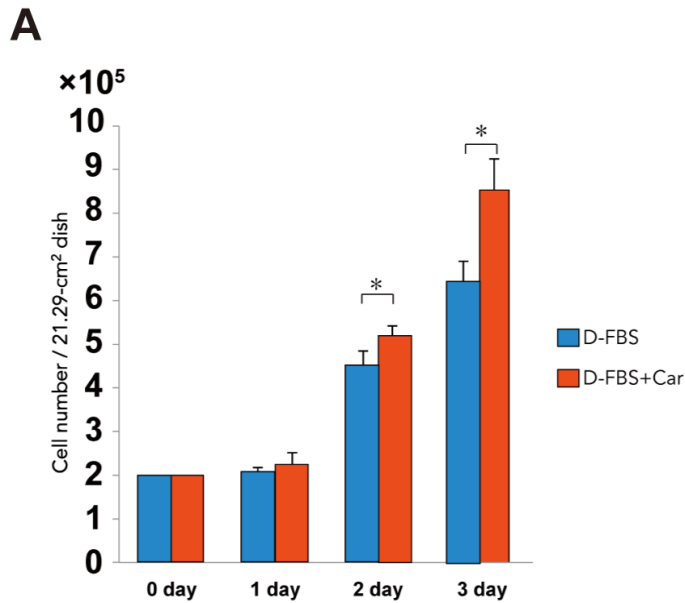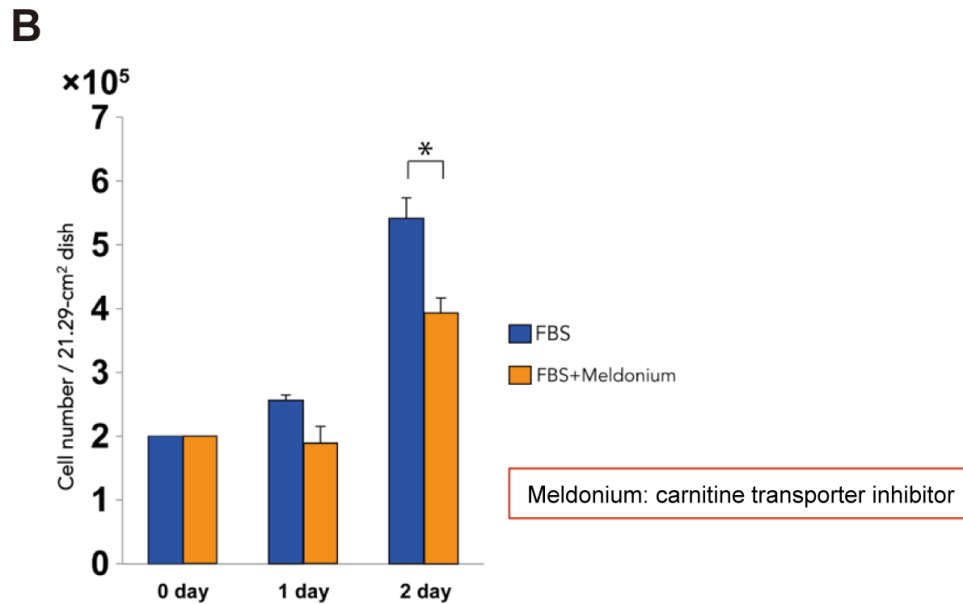

**Supplementary Figure S5.** Proliferation analysis of U87 cells in culture medium with or without carnitine and meldonium.

(A) U87 cells ( $2 \times 10^5$  cells) were plated on 60-mm ( $21.29\text{-cm}^2$ ) culture dishes. Cells were cultured in D-MEM containing with 10% dialyzed fetal bovine serum (D-FBS) with (D-FBS + Car) or without 100  $\mu\text{M}$  carnitine. The number of cells was counted everyday. (B) Cells were either incubated in D-MEM containing with 10% fetal bovine serum (FBS) or FBS supplemented with 2 mM mildronate (FBS + Meldonium). error bar, standard error of mean. \* $P < 0.05$ .

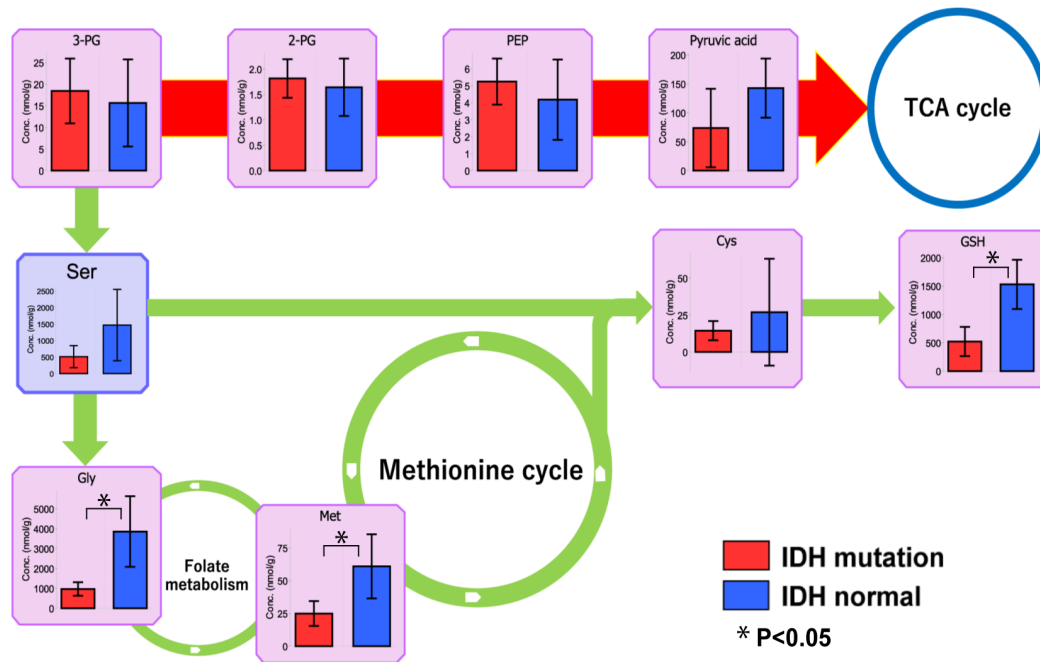

**Supplementary Figure S6.** Analysis of serine, folate and methionine in *IDH* mutation gliomas tissues.

Serine, glycine, and methionine were decreased in gliomas tissues with *IDH* mutation (Fig. 2C). The decrease of serine results in the suppression of folate metabolism and glutathione production. Folate is related to cell division and glutathione is related to oxidative stress. These results may also link to the better prognosis of gliomas with the *IDH* mutation. The vertical scale shows the absolute quantification (nmol/g). Red bars, *IDH1*<sup>R132H</sup> glioma; blue bars, normal *IDH1* glioma. standard error of mean. \* $P < 0.05$ .

### Sample size estimation

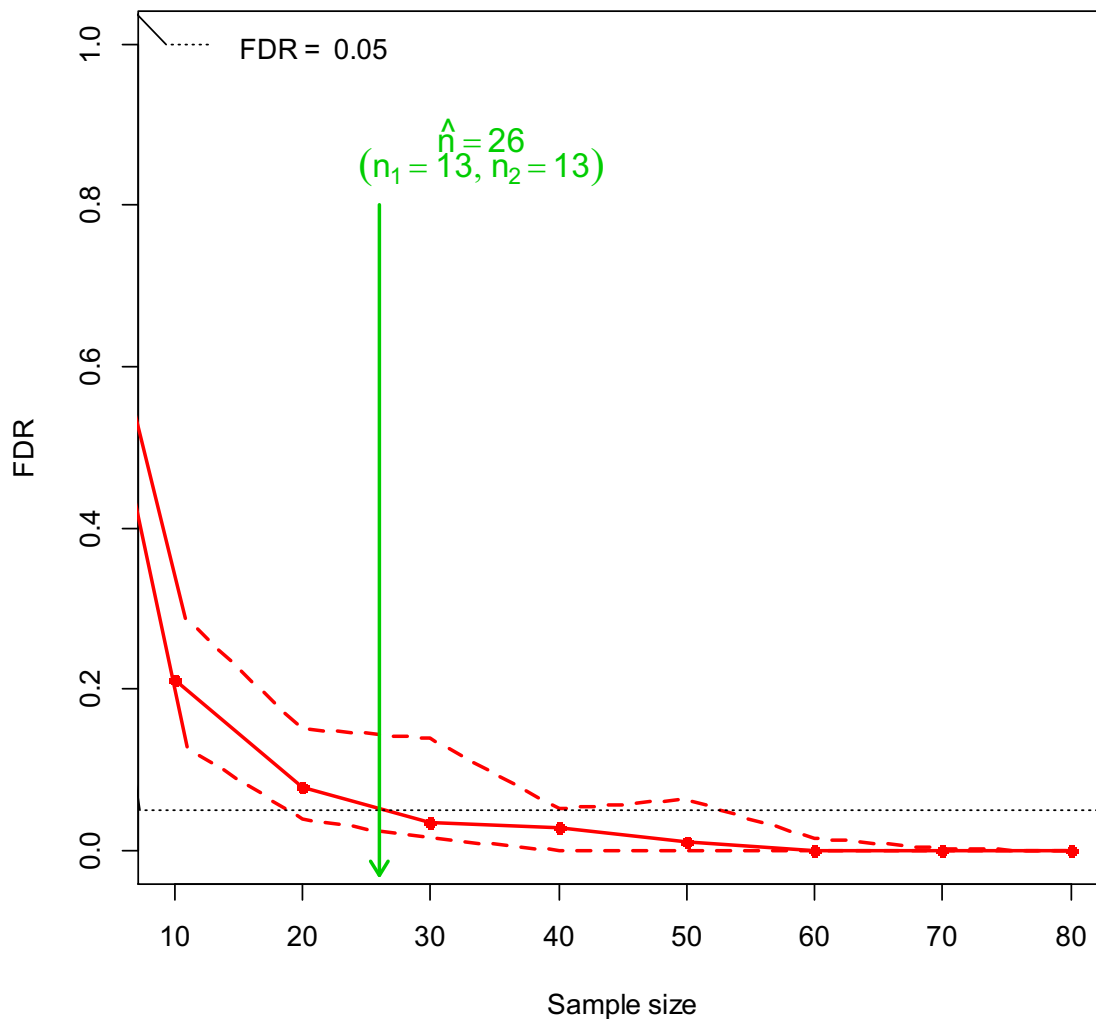

**Supplementary Figure S7.** Sample size estimation without target pilot data using probabilistic principal components analysis model.

We examined the appropriate number of clinical samples using MetSizeR. The analysis condition was the follows, without pilot targeted data, metabolites=100, proportion of significant metabolites=0.3, probabilistic principal components analysis model, target FDR (false discovery rate) = 0.05, sample size per group = 5. This condition is similar to our experimental condition. Solid red line, the estimated FDR; dashed red lines, the 10<sup>th</sup> and 90<sup>th</sup> percentiles; horizontal dashed black line, the target FDR at 5%.



## Head MRI FLAIR image before surgery

### IDH mutation group

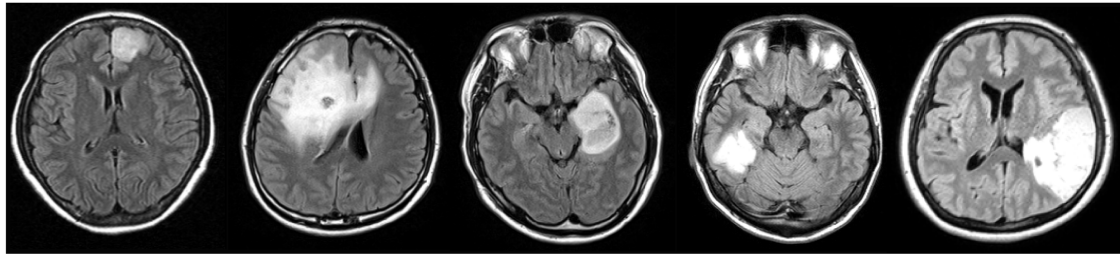

Patient.1

Patient.2

Patient.3

Patient.4

Patient.5

### IDH normal group

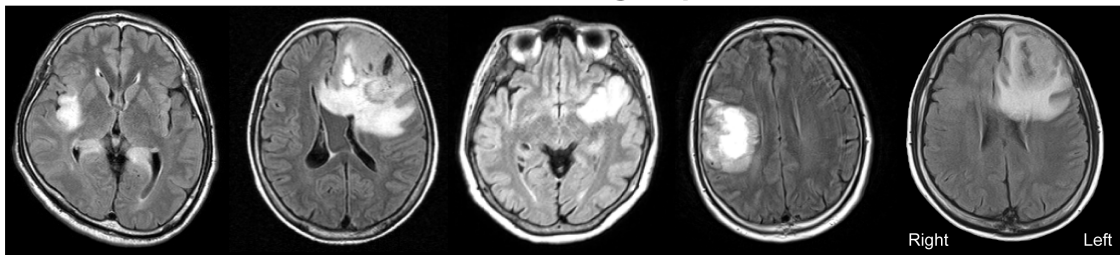

Patient.6

Patient.7

Patient.8

Patient.9

Patient.10

FLAIR: Fluid-Attenuated Inversion Recovery

### Supplementary Figure S8. Head MRI FLAIR image before surgery.

Patient 1-5 are *IDH* mutation group (Patient 1; Oligodendroglioma, Patient 2; Oligodendroglioma, Patient 3; Anaplastic Astrocytoma, Patient 4; Anaplastic Astrocytoma, Patient 5; Anaplastic Oligodendroglioma). Patient 6-10 are *IDH* normal group (Patient 6; Diffuse Astrocytoma, Patient 7; Anaplastic Astrocytoma, Patient 8; Anaplastic Astrocytoma, Patient 9; Glioblastoma; Patient 10; Glioblastoma). FLAIR, Fluid-attenuated inversion recovery.

## Supplementary Table S1

### Two-Sample T-Tests Assuming Equal Variance for carnitine in clinical samples using PASS16

#### Numeric Results for Two-Sample T-Test Assuming Equal Variance

Alternative Hypothesis:  $H1: \delta = \mu1 - \mu2 \neq 0$

| Power   | N1 | N2 | N  | $\delta$ | $\sigma$ | Alpha                                                                    |
|---------|----|----|----|----------|----------|--------------------------------------------------------------------------|
| 0.70378 | 5  | 5  | 10 | 1.7      | 0.4      | $0.00033=1-(0.95)^{1/151}$<br>$\approx 0.05/151$ (Bonferroni correction) |
| 0.99994 | 5  | 5  | 10 | 1.7      | 0.4      | 0.05                                                                     |

#### Report Definitions

Power is the probability of rejecting a false null hypothesis.

N1 and N2 are the number of items sampled from each population.

N is the total sample size,  $N1 + N2$ .

$\mu1$  and  $\mu2$  are the assumed population means.

$\delta = \mu1 - \mu2$  is the difference between population means at which power and sample size calculations are made.

$\sigma$  is the assumed population standard deviation for each of the two groups.

Alpha is the probability of rejecting a true null hypothesis.

#### Summary Statements

Group sample sizes of 5 and 5 achieve 70.378% power to reject the null hypothesis of equal means when the population mean difference is 1.7 with a standard deviation for both groups of 0.4 and with a significance level (alpha) of 0.00033 using a two-sided two-sample t-test.

## Supplementary. Table S2

### Patient information

| Patient | WHO grade | IDH state   | Tumor                        | Age (years) | Sex |
|---------|-----------|-------------|------------------------------|-------------|-----|
| Pt 1    | II        | R132H       | Oligodendroglioma            | 53          | F   |
| Pt 2    | II        | R132H       | Oligodendroglioma            | 38          | M   |
| Pt 3    | III       | R132H       | Anaplastic Astrocytoma       | 39          | M   |
| Pt 4    | III       | R132H       | Anaplastic Astrocytoma       | 40          | M   |
| Pt 5    | III       | R132H       | Anaplastic Oligodendroglioma | 52          | F   |
| Pt 6    | II        | normal type | Diffuse Astrocytoma          | 59          | M   |
| Pt 7    | III       | normal type | Anaplastic Astrocytoma       | 64          | F   |
| Pt 8    | III       | normal type | Anaplastic Astrocytoma       | 59          | F   |
| Pt 9    | IV        | normal type | Glioblastoma                 | 62          | M   |
| Pt 10   | IV        | normal type | Glioblastoma                 | 66          | F   |

*IDH*, isocitrate dehydrogenase; F, female; M, male

Five patients each were in the *IDH* mutant and *IDH* normal groups. The *IDH* mutations were all R132H.

|                                            |                                         |                                         |
|--------------------------------------------|-----------------------------------------|-----------------------------------------|
| <b>Patient 1</b>                           | 53 years old                            | female                                  |
| brain tumor name                           | Oligodendroglioma                       |                                         |
| Anamnesis                                  | Nothing                                 |                                         |
| Preoperative oral medicine                 | phenytoin 200 mg/day                    |                                         |
| Preoperative blood counts                  | White blood cell counts                 | 4400 / $\mu$ L                          |
|                                            | Red blood cell counts                   | 389 $\times$ 10 <sup>4</sup> / $\mu$ L  |
|                                            | Hemoglobin                              | 12.4 g/dL                               |
|                                            | Platelet counts                         | 28.1 $\times$ 10 <sup>4</sup> / $\mu$ L |
| Preoperative blood biochemical examination | Total protein                           | 7.7 g/dL                                |
|                                            | Urea nitrogen                           | 10 mg/dL                                |
|                                            | Creatinine                              | 0.58 mg/dL                              |
|                                            | Total bilirubin                         | 1.02 mg/dL                              |
|                                            | GOT (glutamic oxaloacetic transaminase) | 15 mU/mL                                |
|                                            | GPT (glutamic pyruvic transaminase)     | 7 mU/mL                                 |
|                                            | CPK (creatine phosphokinase)            | 84 mU/mL                                |
|                                            | Sodium                                  | 140 mmol/L                              |
|                                            | Potassium                               | 4.1 mmol/L                              |
|                                            | Chlorine                                | 105 mmol/L                              |
|                                            | Blood sugar                             | 93 mg/dL                                |

|                                            |                                                                        |                                         |
|--------------------------------------------|------------------------------------------------------------------------|-----------------------------------------|
| <b>Patient 2</b>                           | 38 years old                                                           | male                                    |
| brain tumor name                           | Oligodendroglioma                                                      |                                         |
| Anamnesis                                  | Nothing                                                                |                                         |
| Preoperative oral medicine                 | carbamazepine 400 mg/day, betamethasone 3 mg/day, famotidine 40 mg/day |                                         |
| Preoperative blood counts                  | White blood cell counts                                                | 10400 / $\mu$ L                         |
|                                            | Red blood cell counts                                                  | 473 $\times$ 10 <sup>4</sup> / $\mu$ L  |
|                                            | Hemoglobin                                                             | 13.9 g/dL                               |
|                                            | Platelet counts                                                        | 25.2 $\times$ 10 <sup>4</sup> / $\mu$ L |
| Preoperative blood biochemical examination | C-reactive protein                                                     | 0.02 mg/dL                              |
|                                            | Total protein                                                          | 6.5 g/dL                                |
|                                            | Albumin                                                                | 3.8 g/dL                                |
|                                            | Urea nitrogen                                                          | 17 mg/dL                                |
|                                            | Creatinine                                                             | 0.63 mg/dL                              |
|                                            | Total bilirubin                                                        | 0.70 mg/dL                              |
|                                            | GOT (glutamic oxaloacetic transaminase)                                | 36 mU/mL                                |
|                                            | GPT (glutamic pyruvic transaminase)                                    | 148 mU/mL                               |
|                                            | LDH (lactate dehydrogenase)                                            | 266 mU/mL                               |
|                                            | CPK (creatine phosphokinase)                                           | 211 mU/mL                               |
|                                            | Sodium                                                                 | 136 mmol/L                              |
|                                            | Potassium                                                              | 4.5 mmol/L                              |
|                                            | Chlorine                                                               | 100 mmol/L                              |

|                                            |                                                          |                                         |
|--------------------------------------------|----------------------------------------------------------|-----------------------------------------|
| <b>Patient 3</b>                           | 39 years old                                             | male                                    |
| brain tumor name                           | Anaplastic Astrocytoma                                   |                                         |
| Anamnesis                                  | Nothing                                                  |                                         |
| Preoperative oral medicine                 | carbamazepine 400 mg/day                                 |                                         |
| Preoperative blood counts                  | White blood cell counts                                  | 4000 / $\mu$ L                          |
|                                            | Red blood cell counts                                    | 473 $\times$ 10 <sup>4</sup> / $\mu$ L  |
|                                            | Hemoglobin                                               | 14.0 g/dL                               |
|                                            | Platelet counts                                          | 24.2 $\times$ 10 <sup>4</sup> / $\mu$ L |
| Preoperative blood biochemical examination | Total protein                                            | 7.0 g/dL                                |
|                                            | Albumin                                                  | 4.5 g/dL                                |
|                                            | Urea nitrogen                                            | 12 mg/dL                                |
|                                            | Creatinine                                               | 0.70 mg/dL                              |
|                                            | Uric acid                                                | 5.3 mg/dL                               |
|                                            | Total bilirubin                                          | 0.56 mg/dL                              |
|                                            | GOT (glutamic oxaloacetic transaminase)                  | 17 mU/mL                                |
|                                            | GPT (glutamic pyruvic transaminase)                      | 22 mU/mL                                |
|                                            | LDH (lactate dehydrogenase)                              | 166 mU/mL                               |
|                                            | ALP (alkaline phosphatase)                               | 216 mU/mL                               |
|                                            | $\gamma$ GT ( $\gamma$ guru Tamil transformer peptidase) | 56 mU/mL                                |
|                                            | Sodium                                                   | 141 mmol/L                              |
|                                            | Potassium                                                | 4.4 mmol/L                              |
|                                            | Chlorine                                                 | 104 mmol/L                              |
|                                            | Total cholesterol                                        | 154 mg/dL                               |
|                                            | Triglyceride                                             | 94 mg/dL                                |
| Cholinesterase                             | 289 mU/mL                                                |                                         |

|                                            |                                         |                                         |
|--------------------------------------------|-----------------------------------------|-----------------------------------------|
| <b>Patient 4</b>                           | 40 years old                            | male                                    |
| brain tumor name                           | Anaplastic Astrocytoma                  |                                         |
| Anamnesis                                  | Nothing                                 |                                         |
| Preoperative oral medicine                 | carbamazepine 400 mg/day                |                                         |
| Preoperative blood counts                  | White blood cell counts                 | 7500 / $\mu$ L                          |
|                                            | Red blood cell counts                   | 493 $\times$ 10 <sup>4</sup> / $\mu$ L  |
|                                            | Hemoglobin                              | 15.9 g/dL                               |
|                                            | Platelet counts                         | 29.5 $\times$ 10 <sup>4</sup> / $\mu$ L |
| Preoperative blood biochemical examination | Total protein                           | 7.4 g/dL                                |
|                                            | Urea nitrogen                           | 16 mg/dL                                |
|                                            | Creatinine                              | 0.74 mg/dL                              |
|                                            | Total bilirubin                         | 0.39 mg/dL                              |
|                                            | GOT (glutamic oxaloacetic transaminase) | 32 mU/mL                                |
|                                            | GPT (glutamic pyruvic transaminase)     | 51 mU/mL                                |
|                                            | CPK (creatine phosphokinase)            | 93 mU/mL                                |
|                                            | Sodium                                  | 143 mmol/L                              |
|                                            | Potassium                               | 4.1 mmol/L                              |
|                                            | Chlorine                                | 106 mmol/L                              |
|                                            | Blood sugar                             | 150 mg/dl                               |

|                                            |                                                           |                                         |
|--------------------------------------------|-----------------------------------------------------------|-----------------------------------------|
| <b>Patient 5</b>                           | 52 years old                                              | female                                  |
| brain tumor name                           | Anaplastic Oligodendroglioma                              |                                         |
| Anamnesis                                  | Reflux esophagitis                                        |                                         |
| Preoperative oral medicine                 | sodium valproate 800 mg/day, lansoprazole 30 mg/day       |                                         |
| Preoperative blood counts                  | White blood cell counts                                   | 7400 / $\mu$ L                          |
|                                            | Red blood cell counts                                     | 484 $\times$ 10 <sup>4</sup> / $\mu$ L  |
|                                            | Hemoglobin                                                | 14.7 g/dL                               |
|                                            | Platelet counts                                           | 24.0 $\times$ 10 <sup>4</sup> / $\mu$ L |
| Preoperative blood biochemical examination | Total protein                                             | 7.6 g/dL                                |
|                                            | Albumin                                                   | 4.9 g/dL                                |
|                                            | Urea nitrogen                                             | 8 mg/dL                                 |
|                                            | Creatinine                                                | 0.49 mg/dL                              |
|                                            | Total bilirubin                                           | 1.95 mg/dL                              |
|                                            | GOT (glutamic oxaloacetic transaminase)                   | 20 mU/mL                                |
|                                            | GPT (glutamic pyruvic transaminase)                       | 28 mU/mL                                |
|                                            | LDH (lactate dehydrogenase)                               | 154 mU/mL                               |
|                                            | $\gamma$ GT ( $\gamma$ gurun Tamil transformer peptidase) | 30 mU/mL                                |
|                                            | CPK (creatine phosphokinase)                              | 86 mU/mL                                |
|                                            | Sodium                                                    | 145 mmol/L                              |
|                                            | Potassium                                                 | 3.2 mmol/L                              |
|                                            | Chlorine                                                  | 106 mmol/L                              |
|                                            | Blood sugar                                               | 106 mg/dL                               |



|                                            |                                                          |                                         |
|--------------------------------------------|----------------------------------------------------------|-----------------------------------------|
| <b>Patient 6</b>                           | 59 years old                                             | male                                    |
| brain tumor name                           | Diffuse Astrocytoma                                      |                                         |
| Anamnesis                                  | Nothing                                                  |                                         |
| Preoperative oral medicine                 | sodium valproate 800 mg/day                              |                                         |
| Preoperative blood counts                  | White blood cell counts                                  | 4800 / $\mu$ L                          |
|                                            | Red blood cell counts                                    | 401 $\times$ 10 <sup>4</sup> / $\mu$ L  |
|                                            | Hemoglobin                                               | 12.8 g/dL                               |
|                                            | Platelet counts                                          | 23.7 $\times$ 10 <sup>4</sup> / $\mu$ L |
| Preoperative blood biochemical examination | Total protein                                            | 5.5 g/dL                                |
|                                            | Albumin                                                  | 3.6 g/dL                                |
|                                            | Urea nitrogen                                            | 14 mg/dL                                |
|                                            | Creatinine                                               | 0.80 mg/dL                              |
|                                            | Total bilirubin                                          | 0.94 mg/dL                              |
|                                            | GOT (glutamic oxaloacetic transaminase)                  | 13 mU/mL                                |
|                                            | GPT (glutamic pyruvic transaminase)                      | 10 mU/mL                                |
|                                            | LDH (lactate dehydrogenase)                              | 150 mU/mL                               |
|                                            | ALP (alkaline phosphatase)                               | 263 mU/mL                               |
|                                            | $\gamma$ GT ( $\gamma$ guru Tamil transformer peptidase) | 10 mU/ml                                |
|                                            | CPK (creatine phosphokinase)                             | 57 mU/mL                                |
|                                            | Sodium                                                   | 140 mmol/L                              |
|                                            | Potassium                                                | 4.2 mmol/L                              |
|                                            | Chlorine                                                 | 108 mmol/L                              |
|                                            | Blood sugar                                              | 76 mg/dL                                |
|                                            | Total cholesterol                                        | 194 mg/dL                               |
| Triglyceride                               | 225 mg/dL                                                |                                         |
| Cholinesterase                             | 559 mU/mL                                                |                                         |

|                                            |                                         |                                         |
|--------------------------------------------|-----------------------------------------|-----------------------------------------|
| <b>Patient 7</b>                           | 64 years old                            | female                                  |
| brain tumor name                           | Anaplastic Astrocytoma                  |                                         |
| Anamnesis                                  | Gastric polyp                           |                                         |
| Preoperative oral medicine                 | magnesium oxide 1500 mg/day             |                                         |
| Preoperative blood counts                  | White blood cell counts                 | 5100 / $\mu$ L                          |
|                                            | Red blood cell counts                   | 423 $\times$ 10 <sup>4</sup> / $\mu$ L  |
|                                            | Hemoglobin                              | 12.6 g/dL                               |
|                                            | Platelet counts                         | 25.6 $\times$ 10 <sup>4</sup> / $\mu$ L |
| Preoperative blood biochemical examination | Total protein                           | 7.7 g/dL                                |
|                                            | Urea nitrogen                           | 16 mg/dL                                |
|                                            | Creatinine                              | 0.52 mg/dL                              |
|                                            | Total bilirubin                         | 0.62 mg/dL                              |
|                                            | GOT (glutamic oxaloacetic transaminase) | 16 mU/mL                                |
|                                            | GPT (glutamic pyruvic transaminase)     | 11 mU/mL                                |
|                                            | CPK (creatine phosphokinase)            | 47 mU/mL                                |
|                                            | Sodium                                  | 138 mmol/L                              |
|                                            | Potassium                               | 3.8 mmol/L                              |
|                                            | Chlorine                                | 100 mmol/L                              |
|                                            | Blood sugar                             | 112 mg/dL                               |

|                                            |                                                                                     |                                         |
|--------------------------------------------|-------------------------------------------------------------------------------------|-----------------------------------------|
| <b>Patient 8</b>                           | 59 years old                                                                        | female                                  |
| brain tumor name                           | Anaplastic Astrocytoma                                                              |                                         |
| Anamnesis                                  | Cholelithiasis                                                                      |                                         |
| Preoperative oral medicine                 | sodium valproate 800 mg/day, Ursodeoxycholic acid 300mg/day, Furopropion 240 mg/day |                                         |
| Preoperative blood counts                  | White blood cell counts                                                             | 4800 / $\mu$ L                          |
|                                            | Red blood cell counts                                                               | 394 $\times$ 10 <sup>4</sup> / $\mu$ L  |
|                                            | Hemoglobin                                                                          | 12.2 g/dL                               |
|                                            | Platelet counts                                                                     | 20.9 $\times$ 10 <sup>4</sup> / $\mu$ L |
| Preoperative blood biochemical examination | Total protein                                                                       | 6.8 g/dL                                |
|                                            | Albumin                                                                             | 4.1 g/dL                                |
|                                            | Urea nitrogen                                                                       | 14 mg/dL                                |
|                                            | Creatinine                                                                          | 0.59 mg/dL                              |
|                                            | Total bilirubin                                                                     | 1.54 mg/dL                              |
|                                            | GOT (glutamic oxaloacetic transaminase)                                             | 12 mU/mL                                |
|                                            | GPT (glutamic pyruvic transaminase)                                                 | 8 mU/mL                                 |
|                                            | LDH (lactate dehydrogenase)                                                         | 159 mU/mL                               |
|                                            | ALP (alkaline phosphatase)                                                          | 180 mU/mL                               |
|                                            | $\gamma$ GT ( $\gamma$ guru Tamil transformer peptidase)                            | 13 mU/mL                                |
|                                            | CPK (creatine phosphokinase)                                                        | 68 mU/mL                                |
|                                            | Sodium                                                                              | 142 mmol/L                              |
|                                            | Potassium                                                                           | 4.3 mmol/L                              |
|                                            | Chlorine                                                                            | 106 mmol/L                              |
|                                            | Blood sugar                                                                         | 85 mg/dL                                |
|                                            | Cholinesterase                                                                      | 306 mU/mL                               |

|                                            |                                                                                                |                              |
|--------------------------------------------|------------------------------------------------------------------------------------------------|------------------------------|
| <b>Patient 9</b>                           | 62 years old                                                                                   | male                         |
| brain tumor name                           | Glioblastoma                                                                                   |                              |
| Anamnesis                                  | Hypertension                                                                                   |                              |
| Preoperative oral medicine                 | sodium valproate 800 mg/day, isosorbide 90 ml/day, candesartan 8 mg/day, azelnidipine 8 mg/day |                              |
| Preoperative blood counts                  | White blood cell counts                                                                        | 5500 / $\mu$ L               |
|                                            | Red blood cell counts                                                                          | $471 \times 10^4$ / $\mu$ L  |
|                                            | Hemoglobin                                                                                     | 15.0 g/dL                    |
|                                            | Platelet counts                                                                                | $14.3 \times 10^4$ / $\mu$ L |
| Preoperative blood biochemical examination | C-reactive protein                                                                             | 0.06 mg/dL                   |
|                                            | Total protein                                                                                  | 6.7 g/dL                     |
|                                            | Albumin                                                                                        | 4.0 g/dL                     |
|                                            | Urea nitrogen                                                                                  | 22 mg/dL                     |
|                                            | Creatinine                                                                                     | 0.94 mg/dL                   |
|                                            | Total bilirubin                                                                                | 1.06 mg/dL                   |
|                                            | Direct bilirubin                                                                               | 0.14 mg/dL                   |
|                                            | GOT (glutamic oxaloacetic transaminase)                                                        | 26 mU/mL                     |
|                                            | GPT (glutamic pyruvic transaminase)                                                            | 38 mU/mL                     |
|                                            | LDH (lactate dehydrogenase)                                                                    | 165 mU/mL                    |
|                                            | $\gamma$ GT ( $\gamma$ guru Tamil transformer peptidase)                                       | 27 mU/mL                     |
|                                            | Sodium                                                                                         | 143 mmol/L                   |
|                                            | Potassium                                                                                      | 4.0 mmol/L                   |
|                                            | Chlorine                                                                                       | 108 mmol/L                   |
|                                            | Blood sugar                                                                                    | 104 mg/dL                    |

|                                               |                                                                            |                                         |
|-----------------------------------------------|----------------------------------------------------------------------------|-----------------------------------------|
| <b>Patient 10</b>                             | 66 years old                                                               | female                                  |
| brain tumor name                              | Glioblastoma                                                               |                                         |
| Anamnesis                                     | Emphysema, Gastric ulcer                                                   |                                         |
| Preoperative oral medicine                    | phenytoin 200 mg/day, theophylline 200 mg/day,<br>porapurejinku 150 mg/day |                                         |
| Preoperative blood counts                     | White blood cell counts                                                    | 5100 / $\mu$ L                          |
|                                               | Red blood cell counts                                                      | 406 $\times$ 10 <sup>4</sup> / $\mu$ L  |
|                                               | Hemoglobin                                                                 | 12.2 g/dL                               |
|                                               | Platelet counts                                                            | 18.9 $\times$ 10 <sup>4</sup> / $\mu$ L |
| Preoperative blood<br>biochemical examination | Total protein                                                              | 7.1 g/dL                                |
|                                               | Albumin                                                                    | 3.8 g/dL                                |
|                                               | Urea nitrogen                                                              | 16 mg/dL                                |
|                                               | Creatinine                                                                 | 0.67 mg/dL                              |
|                                               | Total bilirubin                                                            | 0.51 mg/dL                              |
|                                               | GOT (glutamic oxaloacetic transaminase)                                    | 21 mU/mL                                |
|                                               | GPT (glutamic pyruvic transaminase)                                        | 16 mU/mL                                |
|                                               | LDH (lactate dehydrogenase)                                                | 171 mU/mL                               |
|                                               | ALP (alkaline phosphatase)                                                 | 246 mU/mL                               |
|                                               | $\gamma$ GT ( $\gamma$ guru Tamil transformer peptidase)                   | 18 mU/mL                                |
|                                               | Sodium                                                                     | 143 mmol/L                              |
|                                               | Potassium                                                                  | 4.2 mmol/L                              |
|                                               | Chlorine                                                                   | 105 mmol/L                              |
|                                               | Blood sugar                                                                | 87 mg/dL                                |

**Supplementary. Table S3**

A

| sample name    | cell amount ( $\times 10^6$ cells) |          |
|----------------|------------------------------------|----------|
|                | CE-TOFMS                           | LC-TOFMS |
| GFP 1          | 4.63                               | 5.44     |
| GFP 2          | 4.63                               | 5.44     |
| GFP 3          | 4.63                               | 5.44     |
| IDH mutation 1 | 4.45                               | 3.68     |
| IDH mutation 2 | 4.45                               | 3.68     |
| IDH mutation 3 | 4.45                               | 3.68     |
| IDH wild 1     | 4.05                               | 3.41     |
| IDH wild 2     | 4.05                               | 3.41     |
| IDH wild 3     | 4.05                               | 3.41     |

CE-TOFMS: capillary electrophoresis mass spectrometry with time-of-flight

LC-TOFMS: liquid chromatography time-of-flight mass spectrometry

GFP: Green Fluorescent Protein

B

| patient number | sample amount (mg) |          |
|----------------|--------------------|----------|
|                | CE-TOFMS           | LC-TOFMS |
| patient 1      | 12                 | 5        |
| patient 2      | 55                 | 74       |
| patient 3      | 48                 | 44       |
| patient 4      | 41                 | 79       |
| patient 5      | 64                 | 94       |
| patient 6      | 25                 | 67       |
| patient 7      | 31                 | 27       |
| patient 8      | 39                 | 73       |
| patient 9      | 86                 | 80       |
| patient 10     | 23                 | 42       |

CE-TOFMS: capillary electrophoresis mass spectrometry with time-of-flight

LC-TOFMS: liquid chromatography time-of-flight mass spectrometry

### Supplementary. Table S4

The conditions for CE-TOFMS and LC-TOFMS made in Human Metabolome Technologies Inc.

A

#### CE-TOFMS

Agilent CE-TOFMS system (Agilent Technologies)

Capillary: Fused silica capillary i.d. 50  $\mu\text{m}$   $\times$  80 cm

|                      | cation mode                             | anion mode                              |
|----------------------|-----------------------------------------|-----------------------------------------|
| Run buffer           | Cation Buffer Solution (p/n:H3301-1001) | Anion Buffer Solution (p/n:H3302-1021)  |
| Rinse buffer         | Cation Buffer Solution (p/n:H3301-1001) | Anion Buffer Solution (p/n:H33022-1022) |
| Sample injection     | Pressure injection 50mbar, 10 sec       | Pressure injection 50mbar, 25 sec       |
| CE voltage           | Positive, 27kV                          | Positive, 30kV                          |
| MS ionization        | ESI Positive                            | ESI Negative                            |
| MS capillary voltage | 4000V                                   | 3500V                                   |
| MS scan range        | m/z 50-1000                             | m/z 50-1000                             |
| Sheath liquid        | HMT Sheath Liquid (p/n: H3301-1020)     | HMT Sheath Liquid (p/n: H3301-1020)     |

B

**LC-TOFMS**

LC system Agilent 1200 series Rapid Resolution LC system SL (Agilent Technologies)

Column Octa Decyl Silyl column, 2 × 50 mm, 2 μm

MS system Agilent LC/MSD TOF (Agilent Technologies)

|                        | positive mode                                                                                                                     | negative mode                                                                                                                     |
|------------------------|-----------------------------------------------------------------------------------------------------------------------------------|-----------------------------------------------------------------------------------------------------------------------------------|
| column temperature     | 40°C                                                                                                                              | 40°C                                                                                                                              |
| Mobile phase           | A: H <sub>2</sub> O/0.1% HCOOH<br>B: Isopropanol: Acetonitrile: H <sub>2</sub> O<br>(65:30:5)/0.1% HCOOH, 2mM HCOONH <sub>4</sub> | A: H <sub>2</sub> O/0.1% HCOOH<br>B: Isopropanol: Acetonitrile: H <sub>2</sub> O<br>(65:30:5)/0.1% HCOOH, 2mM HCOONH <sub>4</sub> |
| Flow rate              | 0.3 mL/min                                                                                                                        | 0.3 mL/min                                                                                                                        |
| Run time               | 20 min                                                                                                                            | 20 min                                                                                                                            |
| Post time              | 6 min                                                                                                                             | 6 min                                                                                                                             |
| Gradient condition     | 0-0.5 min: B 1%<br>0.5-13.5 min: B 1-100%<br>13.5-20 min: B 100%                                                                  | 0-0.5 min: B 1%<br>0.5-13.5 min: B 1-100%<br>13.5-20 min: B 100%                                                                  |
| MS ionization mode     | ESI Positive                                                                                                                      | ESI Negative                                                                                                                      |
| MS Nebulizer pressure  | 40 psi                                                                                                                            | 40 psi                                                                                                                            |
| MS dry gas flow        | 10 L/min                                                                                                                          | 10 L/min                                                                                                                          |
| MS dry gas temperature | 350°C                                                                                                                             | 350°C                                                                                                                             |
| MS capillary voltage   | 4000 V                                                                                                                            | 4000 V                                                                                                                            |
| MS scan range          | m/z 100-1700                                                                                                                      | m/z 100-1700                                                                                                                      |



**Supplementary. Table S5**

List of Abbreviations (Figure, table, supplementary Figure, supplementary table)

| List of Abbreviations       | Compound name                           |
|-----------------------------|-----------------------------------------|
| 1,3-Diaminopropane          | 1,3-Diaminopropane                      |
| Methylimidazoleacetic acid  | 1-Methyl-4-imidazoleacetic acid         |
| Pyrroline 5-carboxylic acid | 1-Pyrroline 5-carboxylic acid           |
| Diphosphoglycerate          | 2,3-Diphosphoglyceric acid              |
| Gensigen                    | 2,5-Dihydroxybenzoic acid               |
| dAdenosine                  | 2'-Deoxyadenosine                       |
| dCyt                        | 2'-Deoxycytidine                        |
| dGuanosine                  | 2'-Deoxyguanosine                       |
| dR1P                        | 2-Deoxyribose 1-phosphate               |
| dUri                        | 2'-Deoxyuridine                         |
| 2-OG                        | 2-Oxoglutaric acid                      |
| 2-KIV                       | 2-Oxoisovaleric acid                    |
| Phenylethylamine            | 2-Phenylethylamine                      |
| 2-PG                        | 2-Phosphoglyceric acid                  |
| T3                          | 3,3',5-Triiodothyronine                 |
| Dephospho-CoA               | 3'-Dephospho CoA                        |
| 3-OHAA                      | 3-Hydroxyanthranilic acid               |
| b-Lactate                   | 3-Hydroxypropionic acid                 |
| MIT                         | 3-Iodotyrosine                          |
| MHPG                        | 3-Methoxy-4-hydroxyphenylethyleneglycol |
| 2K3MVA                      | 3-Methyl-2-oxovaleric acid              |
| 3-PG                        | 3-Phosphoglyceric acid                  |
| 2-Oxoleucine                | 4-Methyl-2-oxovaleric acid              |
| KMTB                        | 4-Methylthio-2-oxobutyric acid          |
| 5-Aminolevulinic acid       | 5-Amino-4-oxovaleric acid               |
| AICAR                       | 5-Aminoimidazole-4-carboxamide ribotide |
| MTA                         | 5'-Deoxy-5'-methylthioadenosine         |
| 5-Hydroxy-IAA               | 5-Hydroxyindoleacetic acid              |
| Pretonine                   | 5-Hydroxytryptophan                     |
| 5MOT                        | 5-Methoxytryptamine                     |
| Oxoproline                  | 5-Oxoproline                            |
| 6-PG                        | 6-Phosphogluconic acid                  |
| AcCoA                       | Acetyl CoA_divalent                     |
| Succinyl AMP                | Adenylosuccinic acid                    |

|              |                                                     |
|--------------|-----------------------------------------------------|
| ADP          | Adenosine diphosphate                               |
| ADP-Rib      | Adenosine diphosphate-ribose                        |
| Ala          | Alanine                                             |
| AMP          | Adenosine monophosphate                             |
| Arg          | Arginine                                            |
| ArgSuccinate | Argininosuccinic acid                               |
| Asn          | Asparagine                                          |
| Asp          | Aspartic acid                                       |
| ATP          | Adenosine Triphosphate                              |
| BTL          | Betaine aldehyde_+H <sub>2</sub> O                  |
| cAMP         | cyclic Adenosine monophosphate                      |
| Carbamoyl-P  | Carbamoylphosphate                                  |
| CDP          | Cytidine dimonophosphate                            |
| CDP-choline  | Cytidine dimonophosphate-choline                    |
| cGMP         | Cyclic guanosine monophosphate                      |
| CMP          | cytidine monophosphate                              |
| CMP-NeuNAc   | cytidine monophosphate- <i>N</i> -acetylneuraminate |
| CoA          | Coenzyme A_divalent                                 |
| CTP          | Cytidine triphosphate                               |
| Cys          | Cysteine                                            |
| Cys-Gly      | Cysteine-Glycine                                    |
| dADP         | deoxyadenosine 5'-diphosphate                       |
| dAMP         | deoxyadenosine monophosphate                        |
| dATP         | deoxyadenosine 5'-triphosphate                      |
| dCDP         | deoxycytidine 5'-diphosphate                        |
| dCMP         | deoxycytidine monophosphate                         |
| dCTP         | deoxycytidine 5'-triphosphate                       |
| Deamido-NAD  | Deamido-nicotinamide adenine dinucleotide+          |
| dGDP         | deoxyguanosine 5'-diphosphate                       |
| dGMP         | deoxyguanosine monophosphate                        |
| dGTP         | deoxyguanosine 5'-triphosphate                      |
| DHAP         | Dihydroxyacetone phosphate                          |
| dIMP         | deoxyinosine monophosphate                          |
| dITP         | deoxyinosine triphosphate                           |
| DOPA         | deoxyphenylalanine                                  |
| dTDP         | deoxythymidine diphosphate                          |
| TDP-Glc      | deoxythymidine diphosphate -glucose                 |
| dTMP         | deoxythymidine monophosphate                        |

|                    |                                |
|--------------------|--------------------------------|
| dTTP               | deoxythymidine 5'-triphosphate |
| dUDP               | deoxyuridine diphosphate       |
| dUMP               | deoxyuridine monophosphate     |
| dUTP               | deoxyuridine triphosphate      |
| E4P                | Erythrose 4-phosphate          |
| EAP                | Ethanolamine phosphate         |
| F1,6P              | Fructose 1,6-diphosphate       |
| D-F1P              | Fructose 1-phosphate           |
| F6P                | Fructose 6-phosphate           |
| GABA               | g-Aminobutyric acid            |
| Gal1P              | Galactose 1-phosphate          |
| GDP                | guanosine diphosphate          |
| GDP-fucose         | guanosine diphosphate-fucose   |
| GDP-Man            | guanosine diphosphate-mannose  |
| Gln                | Glutamine                      |
| Glu                | Glutamic acid                  |
| Glc-6P             | Glucosamine 6-phosphate        |
| G1P                | Glucose 1-phosphate            |
| G6P                | Glucose 6-phosphate            |
| Glutaryl-CoA       | Glutaryl CoA_divalent          |
| GSH                | Glutathione                    |
| GSSG               | Glutathione_divalent           |
| Gly                | Glycine                        |
| GPCCho             | Glycerophosphocholine          |
| Glycocholic acid   | Glycocholic acid               |
| Glycolic acid      | Glycolic acid                  |
| GMP                | guanosine monophosphate        |
| GTP                | guanosine triphosphate         |
| His                | Histidine                      |
| IDP                | inosine diphosphate            |
| Ile                | Isoleucine                     |
| IAA                | Imidazole-4-acetic acid        |
| IMP                | inosine monophosphate          |
| Indoleacetaldehyde | Indole-3-acetaldehyde          |
| 3-IAA              | Indole-3-acetic acid           |
| Isobutyryl-CoA     | Isobutyryl CoA_divalent        |
| ITP                | inosine triphosphate           |
| Leu                | Leucine                        |

|                                    |                                                                                        |
|------------------------------------|----------------------------------------------------------------------------------------|
| Lys                                | Lysine                                                                                 |
| Malic acid                         | Malic acid                                                                             |
| Malonyl-CoA                        | Malonyl CoA_divalent                                                                   |
| Man1P                              | Mannose 1-phosphate                                                                    |
| Man6P                              | Mannose 6-phosphate                                                                    |
| Met                                | Methionine                                                                             |
| Methylmalonic acid                 | Methylmalonic acid                                                                     |
| Myoinositol 1-phosphate            | <i>myo</i> -Inositol 1-phosphate                                                       |
| Myoinositol 3-phosphate            | <i>myo</i> -Inositol 3-phosphate                                                       |
| DMG                                | <i>N,N</i> -Dimethylglycine                                                            |
| N1-Methyl-4-pyridone-5-carboxamide | <i>N</i> <sup>1</sup> -Methyl-4-pyridone-5-carboxamide                                 |
| Trimethyllysine                    | <i>N</i> <sup>6</sup> , <i>N</i> <sup>6</sup> , <i>N</i> <sup>6</sup> -Trimethyllysine |
| N-Acetylaspartic acid              | <i>N</i> -Acetylaspartic acid                                                          |
| GlcNAc                             | <i>N</i> -Acetylglucosamine                                                            |
| GlcNAc-P                           | <i>N</i> -Acetylglucosamine 1-phosphate                                                |
| NAcGlcNP                           | <i>N</i> -Acetylglucosamine 6-phosphate                                                |
| N-AcGlu                            | <i>N</i> -Acetylglutamic acid                                                          |
| NeuNAc                             | <i>N</i> -Acetylneuraminic acid                                                        |
| N-AcOrn                            | <i>N</i> -Acetylmethionine                                                             |
| N-Acetylputrescine                 | <i>N</i> -Acetylputrescine                                                             |
| NAD+                               | nicotinamide adenine dinucleotide+                                                     |
| NADP+                              | nicotinamide adenine dinucleotide phosphate+                                           |
| Carbamoyl-Asp                      | <i>N</i> -Carbamoylaspartic acid                                                       |
| N-Formyl aspartic acid             | <i>N</i> -Formylaspartic acid                                                          |
| Dipterine                          | <i>N</i> -Methyltryptamine                                                             |
| N-Methyltyramine                   | <i>N</i> -Methyltyramine                                                               |
| ALCAL                              | <i>O</i> -Acetylcarnitine                                                              |
| 2-Aminophenol                      | <i>o</i> -Aminophenol                                                                  |
| 2-HPAA                             | <i>o</i> -Hydroxyphenylacetic acid                                                     |
| 3PSer                              | <i>O</i> -Phosphoserine                                                                |
| Orotidine5'P                       | Orotidine 5'-monophosphate                                                             |
| AppppA                             | P <sup>1</sup> , P <sup>4</sup> -Di(adenosine-5') tetraphosphate_divalent              |
| Phe                                | Phenylalanine                                                                          |
| Phenylpyruvate                     | Phenylpyruvic acid                                                                     |
| PEP                                | Phosphoenolpyruvic acid                                                                |
| 4-Hydroxyphenylacetic acid         | <i>p</i> -Hydroxyphenylacetic acid                                                     |
| HPP                                | <i>p</i> -Hydroxyphenylpyruvic acid                                                    |
| Phytic acid                        | Phytic acid_divalent                                                                   |

|                    |                                                     |
|--------------------|-----------------------------------------------------|
| Pro                | Proline                                             |
| Propanoyl-CoA      | Propionyl CoA_divalent                              |
| PRPP               | phosphoribosyl pyrophosphate                        |
| R1P                | Ribose 1-phosphate                                  |
| R5P                | Ribose 5-phosphate                                  |
| Ru5P               | Ribulose 5-phosphate                                |
| SAHC               | S-Adenosylhomocysteine                              |
| SAM                | S-Adenosylmethionine                                |
| S7P                | Sedoheptulose 7-phosphate                           |
| Ser                | Serine                                              |
| SucCoA             | Succinyl CoA_divalent                               |
| Thr                | Threonine                                           |
| 4-L-Hydroxyproline | <i>trans</i> -4-Hydroxyproline                      |
| Trp                | Tryptophan                                          |
| Tyr                | Tyrosine                                            |
| UDP                | uridine 5'-diphosphate                              |
| UDP-Gal            | uridine 5'-diphosphate-galactose                    |
| UDP-Glc            | uridine 5'-diphosphate-glucose                      |
| UDP-GlcA           | uridine 5'-diphosphate-glucuronic acid              |
| UDP-GlcNAc         | uridine 5'-diphosphate- <i>N</i> -acetylglucosamine |
| UMP                | uridine monophosphate                               |
| UTP                | uridine triphosphate                                |
| Val                | Valine                                              |
| VMA                | Vanillylmandelic acid                               |
| XMP                | xanthylic acid                                      |
| XTP                | XTP                                                 |
| X5P                | Xylulose 5-phosphate                                |
| b-Ala              | $\beta$ -Alanine                                    |
| Actinine           | $\gamma$ -Butyrobetaine                             |
| g-Glu-Cys          | $\gamma$ -Glutamic acid-Cysteine                    |
